# Supplementary material
Source: MDPI journal article supplement (https://www.mdpi.com/2072-4292/11/19/2226)
Supplement: s1 [file s1]

# Remote Sensing of Secchi Depth in Highly Turbid Lake Waters and Its Application with MERIS Data

Xiaohan Liu <sup>1,2,3</sup>, Zhongping Lee <sup>2</sup>, Yunlin Zhang <sup>1,\*</sup>, Junfang Lin <sup>3,4</sup>, Kun Shi <sup>1</sup>,  
Yongqiang Zhou <sup>1</sup>, Boqiang Qin <sup>1</sup> and Zhaohua Sun <sup>5</sup>

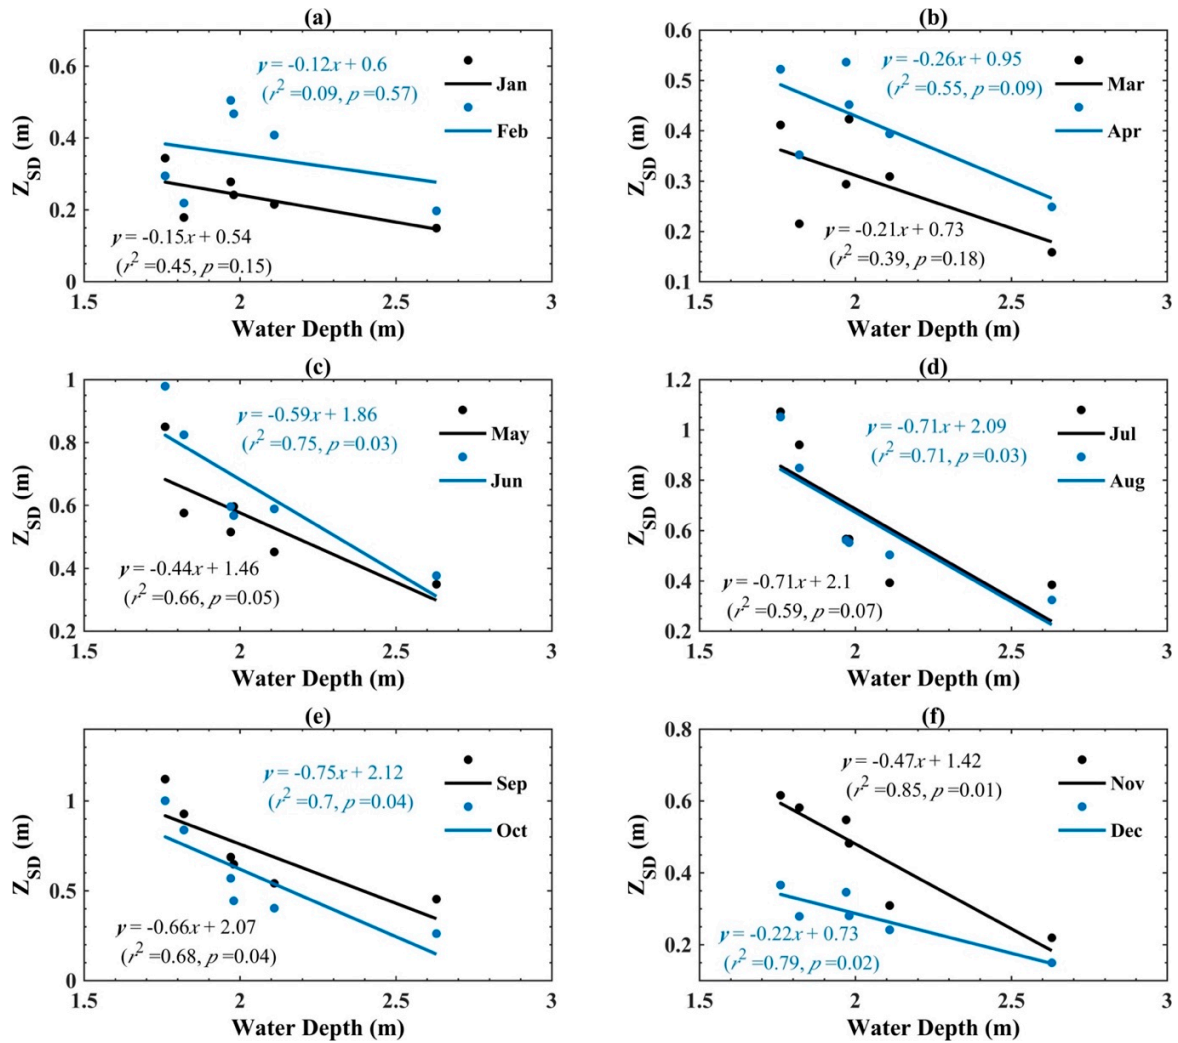

Figure S1. Correlation between monthly average  $Z_{SD}$  and mean water depth in six different regions. The mean depth in each region is: East Lake Taihu (1.76 m), Xukou Bay (1.82 m), Zhushan Bay (1.97 m), Gonghu Bay (1.98 m), Meiliang Bay (2.11 m) and the Open Area (2.63 m).
